# Supplementary material for: Improving the electrochemical performance of layered Li-rich transition-metal oxides by alleviating the blockade effect of surface lithium
Source: Royal Society of Chemistry journal article supplement (doi:10.1039/c5ta10779b), 2016-01-01
Supplement: c5ta10779b1.pdf [file c5ta10779b1.pdf]

**Improving the electrochemical performance of layered Li-rich transition-metal  
oxides by alleviating the blockade effect of surface lithium**

Dong Luo,<sup>a</sup> Shaohua Fang,<sup>\*ac</sup> Li Yang,<sup>\*abc</sup> Shin-ichi Hirano<sup>b</sup>

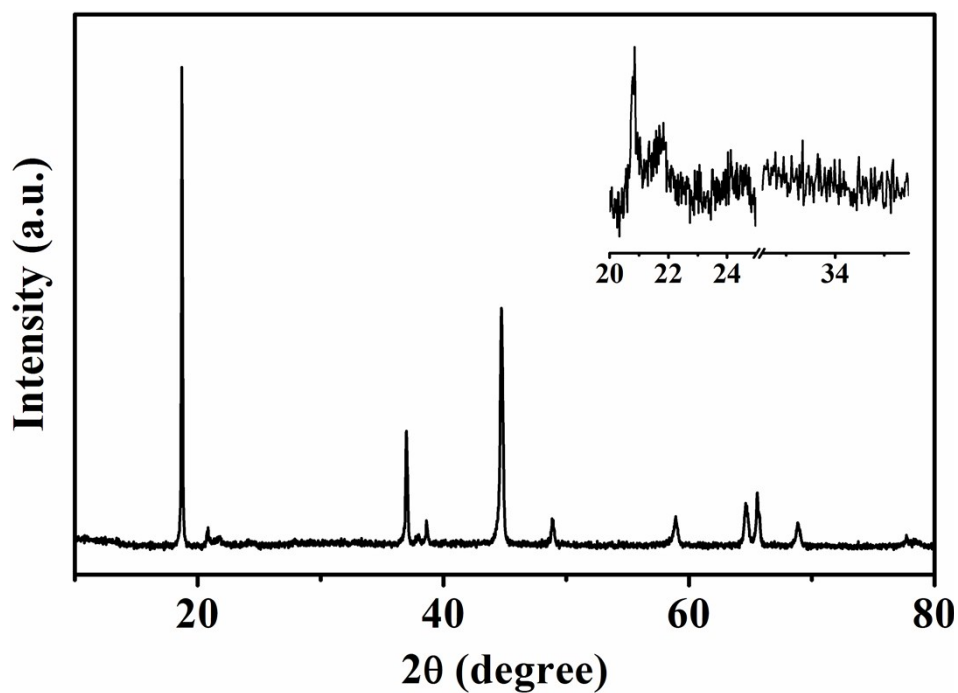

**Figure S1.** XRD pattern of the sample Sc.

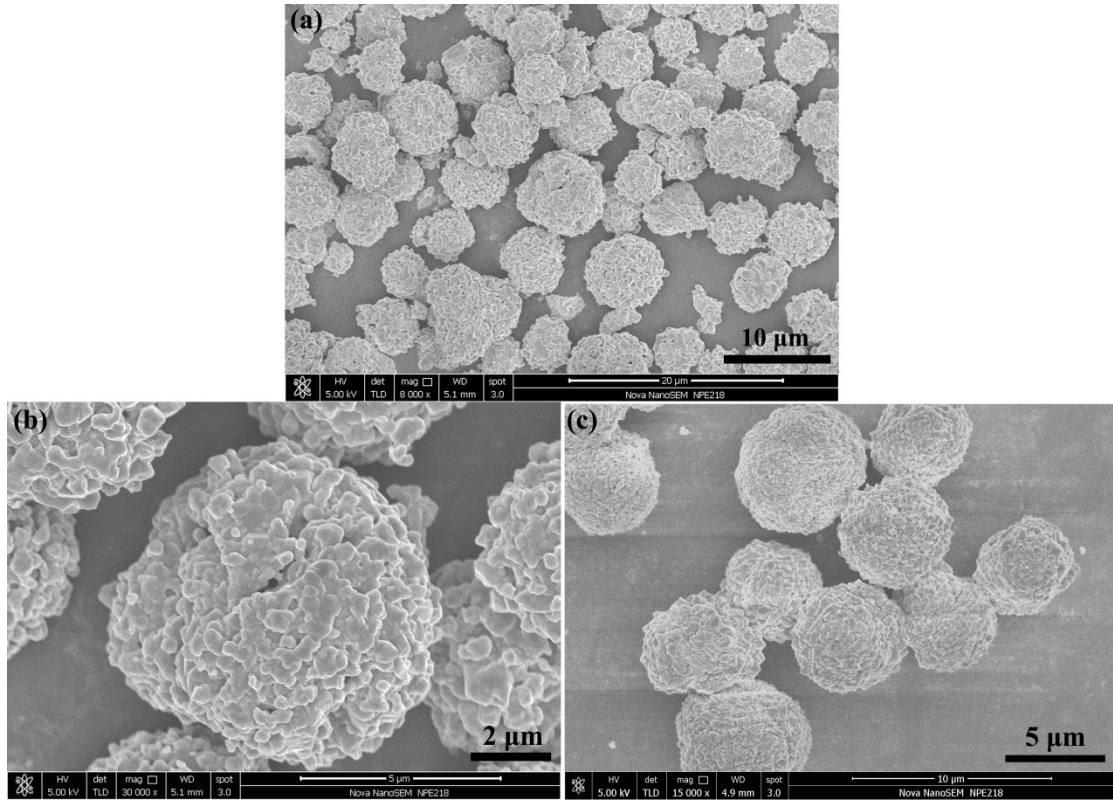

**Figure S2.** SEM images of (a,b) the sample Sc and (c) the precursor.

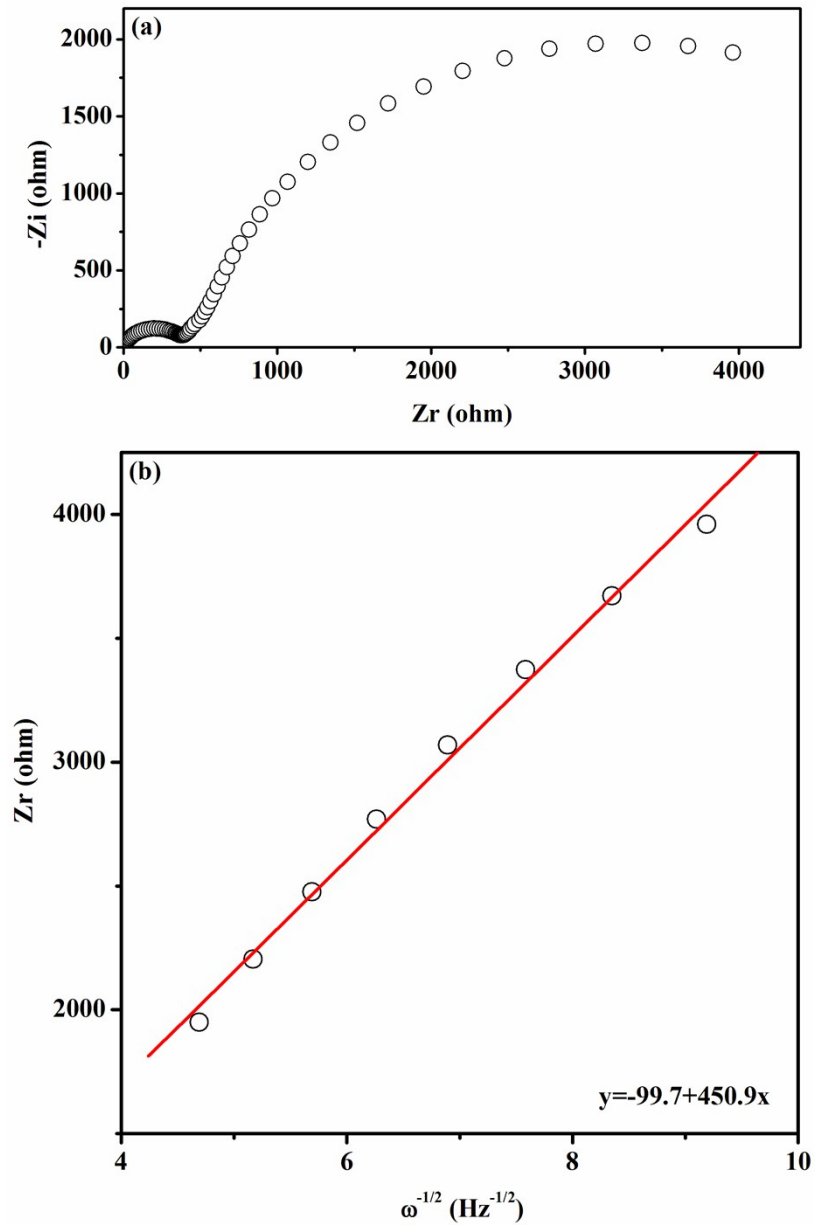

**Figure S3.** (a) Electrochemical impedance spectra of the half-cells charged to 4.8 V during the first cycle and (b) the profiles of Zr vs  $\omega^{-1/2}$  from 0.1 Hz to 0.01 Hz for the sample Sc.

**Table S1.** Chemical composition analysis of the four samples

| <b>Samples</b> | <b>Li</b> | <b>Mn</b> | <b>Ni</b> | <b>Co</b> |
|----------------|-----------|-----------|-----------|-----------|
| <b>Sc</b>      | 1.229     | 0.449     | 0.159     | 0.163     |
| <b>R2</b>      | 1.231     | 0.460     | 0.152     | 0.157     |
| <b>R4</b>      | 1.237     | 0.456     | 0.150     | 0.157     |
| <b>R6</b>      | 1.238     | 0.454     | 0.151     | 0.157     |
| <b>Average</b> | 1.234     | 0.455     | 0.153     | 0.159     |

**Table S2.** The relative percentage of each peak for O 1s spectrum.

| <b>Sample</b> | <b>Relative percentages (%)</b> |                |                 |
|---------------|---------------------------------|----------------|-----------------|
|               | <b>Peak I</b>                   | <b>Peak II</b> | <b>Peak III</b> |
| <b>Sc</b>     | 61.0                            | 33.8           | 5.2             |
| <b>R2</b>     | 63.7                            | 28.0           | 8.3             |
| <b>R4</b>     | 52.0                            | 36.5           | 11.5            |
| <b>R6</b>     | 42.7                            | 50.1           | 6.2             |

Based on the XPS spectra, the surface contents of metal elements are calculated by the below method. Firstly, we fitted the XPS spectra of metal elements by the software CasaXPS. Then, the strongest peaks in each XPS spectrum of metal elements of the same sample were meanwhile selected. And, using the function of quantitative analysis of the software CasaXPS, we obtained the quality percentage of surface metal elements and calculated out the stoichiometric ratio of surface metal elements. Finally, the change trend of surface relative content of lithium in the four samples was determined by comparing the value of surface Li/TM.
